# Supplementary material
Source: PubMed Central journal article supplement (PMC1435801)
Supplement: plntphys_pp.105.074898_1.pdf [file plntphys_pp.105.074898_1.pdf]

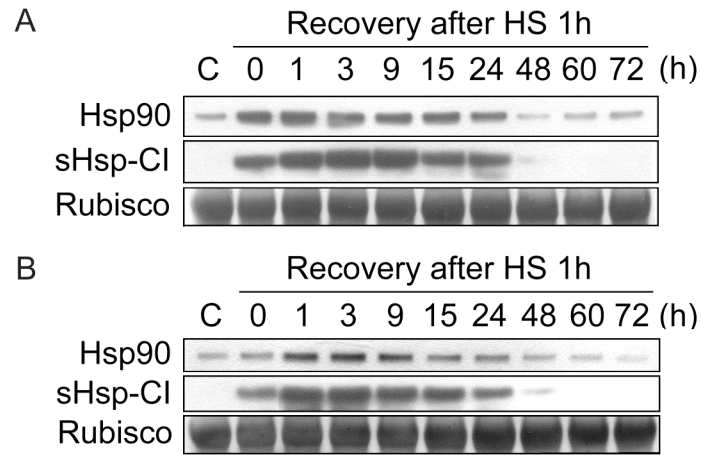

Supp. Fig. 1 Immunoblotting analysis of sHsp-Cl and Hsp90 in Arabidopsis wild-type (A) and *hsa32-1* (B) 3-d old seedlings recovered for indicated time after HS treatment at 37°C for 1 h. In each lane 50 µg of protein was loaded. Rubisco large subunit stained by amido black was shown to ensure equal loading.
