# Supplementary material
Source: PubMed Central journal article supplement (PMC1435801)
Supplement: plntphys_pp.105.074898_2.pdf [file plntphys_pp.105.074898_2.pdf]

Supplementary Table 1. Gene-specific primers for RT-PCR amplification of cDNAs

| Gene name        | cDNA accession number | Primer name  | Direction | Sequence (5' to 3')            |
|------------------|-----------------------|--------------|-----------|--------------------------------|
| <i>AtHsa32</i>   | AK118775              | AtHsa32-1    | forward   | CCATGGCGGCTTACTACAGATGGAAG     |
|                  |                       | AtHsa32-6    | reverse   | AAGCTTAAACAAGAAGTAGGAGGAACTGAG |
| <i>OsHsa32</i>   | AY623907              | OsHsa32-1    | forward   | CCATGGCGATGCGGCGGTGGAGAG       |
|                  |                       | OsHsa32-1    | reverse   | TCACATCAGGAAGAAGGGCGAGCC       |
| <i>PpHsa32</i>   | AY772008              | PpHsa32-1    | forward   | CCATGGAGGAAAAGCTTATTCTTCTAAGTG |
|                  |                       | PpHsa32-2    | reverse   | GAGCTCGATCACGCAAAGTGGATGCTTCGG |
| <i>AtHsp21</i>   | X54102                | AtHsp21-1    | forward   | ATGGCTTCTACTCTCATTTGCTG        |
|                  |                       | AtHsp21-2    | reverse   | CTACTGAATCTGGACATCGATGACT      |
| <i>OsHsp16.9</i> | U81385                | OsHsp16.9C-1 | forward   | CGCCGACTTCTGGGACCCC            |
|                  |                       | OsHsp16.9C-2 | reverse   | CTCAATGGCCTTCACCTCGGGC         |
| <i>PpsHsp</i>    | BQ827513              | PpsHsp-1     | forward   | GCTTCTCGCGATCTTATTCCGCAG       |
|                  |                       | PpsHsp-2     | reverse   | CCAGTTGTACCTTCACGTCGGCTG       |
| <i>PpActin</i>   | AW698983              | PpActin-1    | forward   | CGGAGAGGAAGTACAGTGTGTGGA       |
|                  |                       | PpActin-2    | reverse   | ACCAGCCGTTAGAATTGAGCCCAG       |
